# Supplementary material for: Parent Cardiac Response in the Context of Their Child’s Completion of the Cold Pressor Task: A Pilot Study
Source: MDPI journal article supplement (doi:10.3390/children4110100), 2017-11-21
Supplement: s1 [file s1]

**Table S1.** Bivariate Correlations Between Children's Typical Response to Pain and Parent Heart Rate (HR) ( $N = 25$ ).

|                                    | 1                   | 2                   | 3                   | 4                  | 5                  |
|------------------------------------|---------------------|---------------------|---------------------|--------------------|--------------------|
| 1. Typical Response to Needle Pain |                     |                     |                     |                    |                    |
| 2. HR Rest                         | -.32<br>[-.63, .09] |                     |                     |                    |                    |
| 3. HR Pre-CPT                      | -.34<br>[-.65, .06] | .90**<br>[.79, .96] |                     |                    |                    |
| 4. HR Post-CPT <sup>a</sup>        | -.29<br>[-.62, .13] | .95**<br>[.88, .98] | .91**<br>[.80, .96] |                    |                    |
| 5. HR Phasic                       | -.12<br>[-.49, .29] | -.01<br>[-.41, .38] | .41*<br>[.02, .69]  | .11<br>[-.30, .50] |                    |
| 6. HR Recovery <sup>a</sup>        | .09<br>[-.32, .48]  | -.15<br>[-.52, .27] | .05<br>[-.36, .44]  | .17<br>[-.25, .54] | .42*<br>[.03, .71] |

HR Phasic = change score subtracting HR during resting from HR during pre-cold pressor task (CPT); HR Recovery = change score subtracting HR during resting from HR during post-CPT. Values in square brackets indicate the 95% confidence interval for each correlation. <sup>a</sup> $n = 24$ . \* $p < 0.05$ . \*\* $p < 0.01$ .

**Table S2.** Bivariate Correlations Between Children's Typical Response to Needle Pain and Parent Heart Rate Variability ( $N = 25$ ).

|                                    | 1                   | 2                     | 3                   | 4                   | 5                   | 6                     | 7                      | 8                   | 9                  | 10                  |
|------------------------------------|---------------------|-----------------------|---------------------|---------------------|---------------------|-----------------------|------------------------|---------------------|--------------------|---------------------|
| 1. Typical Response to Needle Pain |                     |                       |                     |                     |                     |                       |                        |                     |                    |                     |
| 2. HF-HRV Rest                     | .41*<br>[.02, .69]  |                       |                     |                     |                     |                       |                        |                     |                    |                     |
| 3. HF-HRV Pre-CPT                  | .38<br>[-.01, .68]  | .65**<br>[.34, .83]   |                     |                     |                     |                       |                        |                     |                    |                     |
| 4. HF-HRV Post-CPT <sup>a</sup>    | .46*<br>[.06, .73]  | .54**<br>[.17, .77]   | .72**<br>[.45, .87] |                     |                     |                       |                        |                     |                    |                     |
| 5. HF-HRV Phasic                   | .10<br>[-.31, .47]  | -.14<br>[-.51, .27]   | .66**<br>[.36, .84] | .40<br>[-.01, .69]  |                     |                       |                        |                     |                    |                     |
| 6. HF-HRV Recovery <sup>a</sup>    | .03<br>[-.38, .43]  | -.50*<br>[-.75, -.12] | .09<br>[-.32, .48]  | .46*<br>[.07, .73]  | .59**<br>[.24, .80] |                       |                        |                     |                    |                     |
| 7. RMSSD Rest                      | .38<br>[-.01, .68]  | .89**<br>[.77, .95]   | .48*<br>[.11, .74]  | .44*<br>[.05, .72]  | -.25<br>[-.59, .16] | -.48*<br>[-.74, -.09] |                        |                     |                    |                     |
| 8. RMSSD Pre-CPT                   | .54**<br>[.19, .77] | .76**<br>[.51, .89]   | .86**<br>[.71, .94] | .73**<br>[.46, .87] | .38<br>[-.02, .67]  | -.02<br>[-.42, .39]   | .70**<br>[.42, .86]    |                     |                    |                     |
| 9. RMSS Post-CPT <sup>a</sup>      | .47*<br>[.09, .74]  | .61**<br>[.28, .81]   | .71**<br>[.43, .86] | .86**<br>[.70, .94] | .31<br>[-.11, .63]  | .24<br>[-.18, .59]    | .59**<br>[.25, .80]    | .86**<br>[.70, .94] |                    |                     |
| 10. RMSSD Phasic <sup>b</sup>      | .15<br>[-.26, .51]  | -.15<br>[-.51, .26]   | .31<br>[-.11, .63]  | .25<br>[-.16, .59]  | .75**<br>[.50, .88] | .59**<br>[.25, .80]   | -.30<br>[-.63, .11]    | .36<br>[-.04, .65]  | .28<br>[-.12, .61] |                     |
| 11. RMSSD Recovery <sup>a</sup>    | -.00<br>[-.41, .40] | -.47*<br>[-.73, -.08] | .16<br>[-.26, .53]  | .30<br>[-.11, .63]  | .64**<br>[.32, .83] | .81**<br>[.60, .91]   | -.63**<br>[-.82, -.30] | .03<br>[-.38, .43]  | .26<br>[-.16, .60] | .75**<br>[.50, .88] |

HF-HRV Phasic = change score subtracting high-frequency heart rate variability (HF-HRV) during resting from HF-HRV during pre-CPT; HF-HRV Recovery = change score subtracting HF-HRV during resting from HF-HRV during post-CPT. RMSSD Phasic = change score subtracting the root mean square of successive differences (RMSSD) during resting from RMSSD during pre-CPT; RMSSD Recovery = change score subtracting RMSSD during resting from RMSSD during post-CPT. Values in square brackets indicate the 95% confidence interval for each correlation. <sup>a</sup> $n = 24$ ; <sup>b</sup>Spearman's correlation coefficient. \* $p < 0.05$ . \*\* $p < 0.01$
